# Supplementary material
Source: MDPI journal article supplement (https://www.mdpi.com/2073-4395/12/10/2405)
Supplement: s1 [file s1]

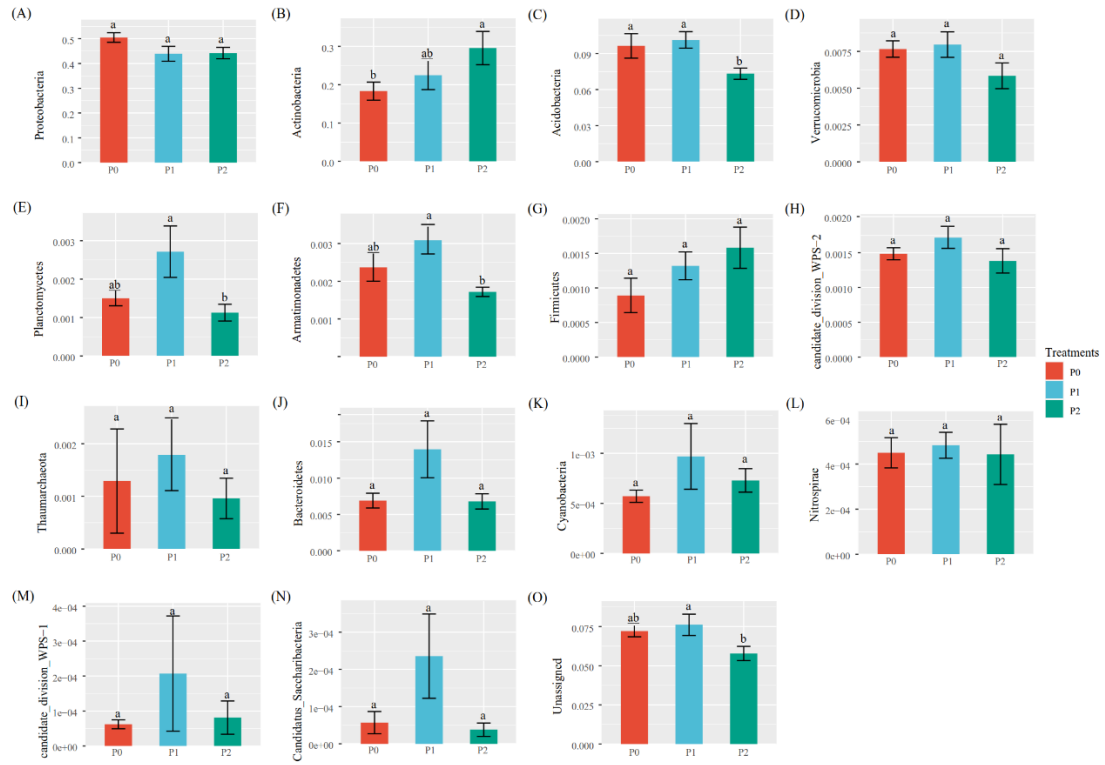

**Figure S1.** The relative abundance of the first ten rhizosphere bacteria. Different letters on each bar represent significant differences among treatments at a significance level of  $p < 0.05$ .

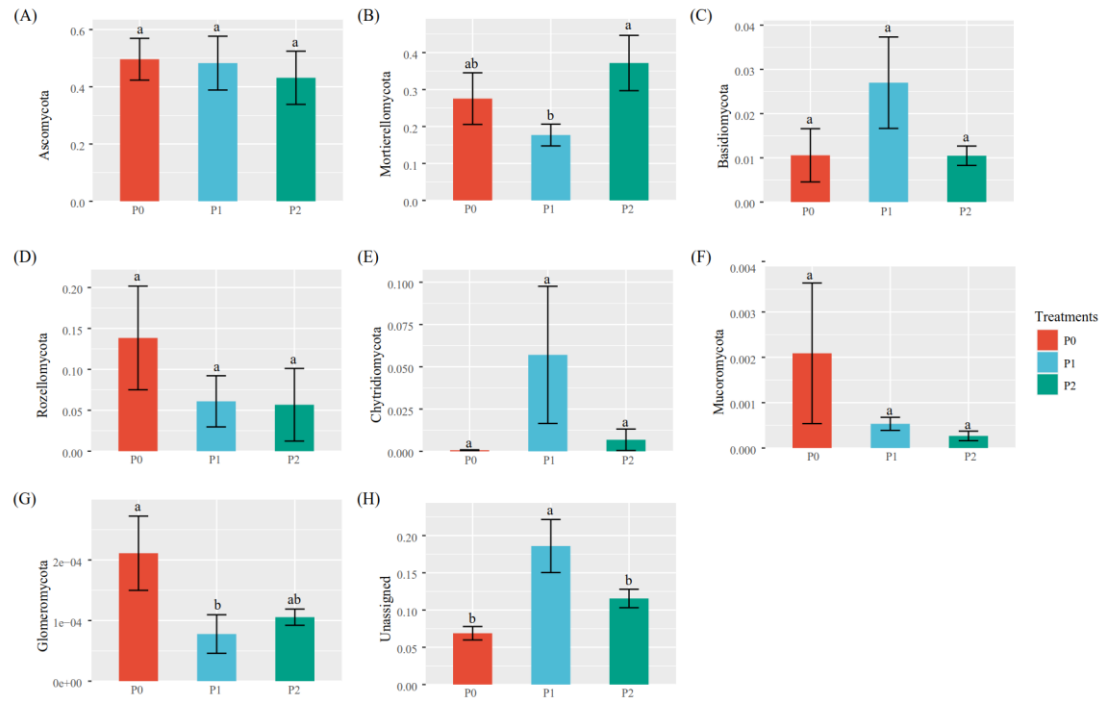

**Figure S2.** The relative abundance of the first ten rhizosphere fungi. Different letters on each bar represent significant differences among treatments at a significance level of  $p < 0.05$ .

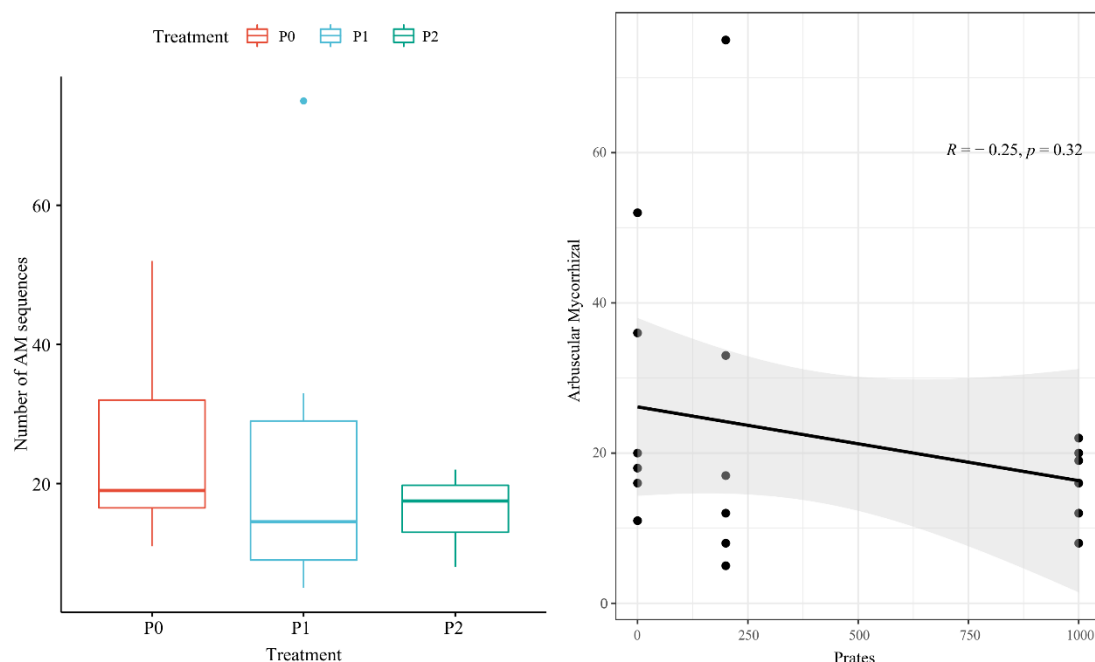

**Figure S3.** Effect of phosphorus fertilizer addition rates on AMF.

**Table S1.** Functional gene pathway differences (mean  $\pm$  standard error).

| Factor  | description                                         | TP0               | TP1                | TP2                |
|---------|-----------------------------------------------------|-------------------|--------------------|--------------------|
| ko00010 | Glycolysis / Gluconeogenesis                        | 29.4 $\pm$ 0.46b  | 31.15 $\pm$ 0.23a  | 31.34 $\pm$ 0.37a  |
| ko00020 | Citrate cycle (TCA cycle)                           | 35.57 $\pm$ 0.85b | 37.93 $\pm$ 0.31a  | 37.68 $\pm$ 0.61a  |
| ko00030 | <b>Pentose phosphate pathway</b>                    | 35.99 $\pm$ 0.56b | 38.05 $\pm$ 0.16a  | 37.62 $\pm$ 0.35a  |
| ko00051 | Fructose and mannose metabolism                     | 16.12 $\pm$ 0.25b | 17.11 $\pm$ 0.4ab  | 17.38 $\pm$ 0.36a  |
| ko00052 | Galactose metabolism                                | 18.43 $\pm$ 0.58b | 20.46 $\pm$ 0.47a  | 20.5 $\pm$ 0.46a   |
| ko00072 | Synthesis and degradation of ketone bodies          | 70.49 $\pm$ 0.84b | 72.54 $\pm$ 1.01ab | 74.68 $\pm$ 0.84a  |
| ko00100 | Steroid biosynthesis                                | 1.79 $\pm$ 0.1a   | 1.56 $\pm$ 0.11ab  | 1.34 $\pm$ 0.13b   |
| ko00120 | Primary bile acid biosynthesis                      | 1.16 $\pm$ 0.09a  | 0.87 $\pm$ 0.07b   | 0.84 $\pm$ 0.09b   |
| ko00121 | Secondary bile acid biosynthesis                    | 3.17 $\pm$ 0.48a  | 1.79 $\pm$ 0.16b   | 2.07 $\pm$ 0.2b    |
| ko00250 | Alanine, aspartate and glutamate metabolism         | 35.94 $\pm$ 0.91b | 38.15 $\pm$ 0.4a   | 36.89 $\pm$ 0.63ab |
| ko00260 | Glycine, serine and threonine metabolism            | 34.82 $\pm$ 0.43b | 36.47 $\pm$ 0.23a  | 36.5 $\pm$ 0.34a   |
| ko00311 | Penicillin and cephalosporin biosynthesis           | 6.93 $\pm$ 0.31b  | 7.8 $\pm$ 0.44ab   | 8.91 $\pm$ 0.5a    |
| ko00364 | Fluorobenzoate degradation                          | 14.58 $\pm$ 0.63a | 13.13 $\pm$ 0.65ab | 12.12 $\pm$ 0.72b  |
| ko00400 | Phenylalanine, tyrosine and tryptophan biosynthesis | 28.83 $\pm$ 0.71b | 30.55 $\pm$ 0.26a  | 29.68 $\pm$ 0.44ab |
| ko00430 | Taurine and hypotaurine metabolism                  | 27.26 $\pm$ 0.81a | 25.45 $\pm$ 0.66ab | 24.03 $\pm$ 0.86b  |
| ko00440 | <b>Phosphonate and phosphinate metabolism</b>       | 5.81 $\pm$ 0.23a  | 5.32 $\pm$ 0.25ab  | 5.06 $\pm$ 0.25b   |
| ko00460 | Cyanoamino acid metabolism                          | 26.58 $\pm$ 0.4b  | 27.54 $\pm$ 0.08a  | 27.48 $\pm$ 0.21a  |
| ko00500 | Starch and sucrose metabolism                       | 21.29 $\pm$ 0.54b | 23.34 $\pm$ 0.52a  | 23.71 $\pm$ 0.54a  |
| ko00510 | N-Glycan biosynthesis                               | 1.41 $\pm$ 0.09b  | 1.65 $\pm$ 0.04a   | 1.55 $\pm$ 0.04ab  |
| ko00511 | Other glycan degradation                            | 13.53 $\pm$ 0.84b | 16.04 $\pm$ 0.82a  | 15.8 $\pm$ 0.53a   |
| ko00520 | Amino sugar and nucleotide sugar metabolism         | 21.38 $\pm$ 0.53b | 23.16 $\pm$ 0.21a  | 22.55 $\pm$ 0.28a  |
| ko00521 | Streptomycin biosynthesis                           | 44.31 $\pm$ 0.75b | 47.22 $\pm$ 0.26a  | 46.13 $\pm$ 0.48a  |
| ko00524 | Butirosin and neomycin biosynthesis                 | 7.12 $\pm$ 0.25b  | 7.99 $\pm$ 0.12a   | 7.82 $\pm$ 0.14a   |
| ko00531 | Glycosaminoglycan degradation                       | 3.93 $\pm$ 0.28b  | 4.73 $\pm$ 0.21a   | 4.33 $\pm$ 0.11ab  |
| ko00561 | Glycerolipid metabolism                             | 13.04 $\pm$ 0.15b | 13.52 $\pm$ 0.04a  | 13.36 $\pm$ 0.11a  |
| ko00562 | <b>Inositol phosphate metabolism</b>                | 15.4 $\pm$ 0.26b  | 16.2 $\pm$ 0.37ab  | 16.87 $\pm$ 0.42a  |
| ko00600 | Sphingolipid metabolism                             | 5.66 $\pm$ 0.11ab | 5.91 $\pm$ 0.14a   | 5.53 $\pm$ 0.09b   |
| ko00621 | Dioxin degradation                                  | 8.58 $\pm$ 0.66a  | 6.95 $\pm$ 0.48ab  | 6.25 $\pm$ 0.62b   |
| ko00633 | Nitrotoluene degradation                            | 10.42 $\pm$ 0.67a | 9.69 $\pm$ 0.67ab  | 8.06 $\pm$ 0.82b   |
| ko00670 | One carbon pool by folate                           | 36.97 $\pm$ 0.85b | 39.92 $\pm$ 0.23a  | 39.61 $\pm$ 0.54a  |

| Factor  | description                                                | TP0         | TP1         | TP2          |
|---------|------------------------------------------------------------|-------------|-------------|--------------|
| ko00710 | Carbon fixation in photosynthetic organisms                | 32.97±0.58b | 34.41±0.34a | 33.46±0.48ab |
| ko00730 | Thiamine metabolism                                        | 29.25±0.91b | 31.39±0.51a | 29.55±0.57ab |
| ko00760 | Nicotinate and nicotinamide metabolism                     | 29.59±0.51b | 31.07±0.28a | 30.42±0.5ab  |
| ko00785 | Lipoic acid metabolism                                     | 42.47±0.98b | 45.87±0.44a | 45.4±0.79a   |
| ko00790 | Folate biosynthesis                                        | 28.08±0.83b | 30.59±0.23a | 30.42±0.5a   |
| ko00900 | Terpenoid backbone biosynthesis                            | 32.09±0.69b | 33.89±0.35a | 32.93±0.58ab |
| ko00941 | Flavonoid biosynthesis                                     | 1.52±0.08a  | 1.43±0.1ab  | 1.15±0.1b    |
| ko00943 | Isoflavonoid biosynthesis                                  | 0.34±0.08a  | 0.14±0.02b  | 0.14±0.02b   |
| ko00965 | Betalain biosynthesis                                      | 3.01±0.32ab | 3.2±0.26a   | 2.28±0.23b   |
| ko00983 | Drug metabolism - other enzymes                            | 21.33±0.66b | 23.39±0.15a | 23.23±0.37a  |
| ko01053 | Biosynthesis of siderophore group nonribosomal peptides    | 0.95±0.06b  | 1.09±0.08ab | 1.26±0.07a   |
| ko01055 | Biosynthesis of vancomycin group antibiotics               | 54.54±1.4ab | 55.73±1.49a | 50.21±1.9b   |
| ko02030 | Bacterial chemotaxis                                       | 49.08±2.45a | 45.5±3.19ab | 39.14±3.58b  |
| ko02060 | Phosphotransferase system (PTS)                            | 3.01±0.05b  | 3.15±0.04a  | 3.21±0.03a   |
| ko03030 | DNA replication                                            | 23.01±0.72b | 24.68±0.35a | 23.63±0.51ab |
| ko03050 | Proteasome                                                 | 1.14±0.13b  | 1.41±0.2ab  | 1.78±0.21a   |
| ko03060 | Protein export                                             | 31.97±1.09b | 34.54±0.59a | 32.94±0.73ab |
| ko03410 | Base excision repair                                       | 26.02±0.71b | 28.01±0.17a | 27.69±0.42a  |
| ko03420 | Nucleotide excision repair                                 | 17.76±0.43b | 18.98±0.15a | 18.67±0.23a  |
| ko03450 | Non-homologous end-joining                                 | 7.26±0.32b  | 7.91±0.17ab | 8.17±0.21a   |
| ko04113 | Meiosis - yeast                                            | 1±0.03b     | 1.1±0.02a   | 1.09±0.02a   |
| ko04142 | Lysosome                                                   | 1.11±0.07b  | 1.28±0.04a  | 1.24±0.03ab  |
| ko04962 | Vasopressin-regulated water reabsorption                   | 0±0ab       | 0±0a        | 0±0b         |
| ko04974 | Protein digestion and absorption                           | 0.34±0.04ab | 0.37±0.03a  | 0.27±0.02b   |
| ko05120 | Epithelial cell signaling in Helicobacter pylori infection | 1.02±0.02ab | 1.01±0.02b  | 1.06±0.01a   |
| ko05143 | African trypanosomiasis                                    | 1.13±0.06b  | 1.33±0.04a  | 1.34±0.05a   |

Table S2. Highly probable ZOTUs identified by FUNGuild.

| OTU_ID   | Guild                          |
|----------|--------------------------------|
| Zotu_129 | Undefined Saprotroph           |
| Zotu_111 | Arbuscular Mycorrhizal         |
| Zotu_293 | Arbuscular Mycorrhizal         |
| Zotu_264 | Arbuscular Mycorrhizal         |
| Zotu_306 | Arbuscular Mycorrhizal         |
| Zotu_246 | Arbuscular Mycorrhizal         |
| Zotu_298 | Arbuscular Mycorrhizal         |
| Zotu_197 | Arbuscular Mycorrhizal         |
| Zotu_237 | Arbuscular Mycorrhizal         |
| Zotu_320 | Plant Pathogen-Wood Saprotroph |
| Zotu_193 | Arbuscular Mycorrhizal         |
| Zotu_252 | Arbuscular Mycorrhizal         |
| Zotu_289 | Arbuscular Mycorrhizal         |
| Zotu_239 | Arbuscular Mycorrhizal         |
| Zotu_260 | Arbuscular Mycorrhizal         |
| Zotu_269 | Arbuscular Mycorrhizal         |
| Zotu_234 | Arbuscular Mycorrhizal         |
| Zotu_302 | Arbuscular Mycorrhizal         |
